# Supplementary material for: GAI Functions in the Plant Response to Dehydration Stress in Arabidopsis thaliana
Source: MDPI journal article supplement (doi:10.3390/ijms21030819), 2020-01-27
Supplement: s1 [file s1]

Supplemental Figure

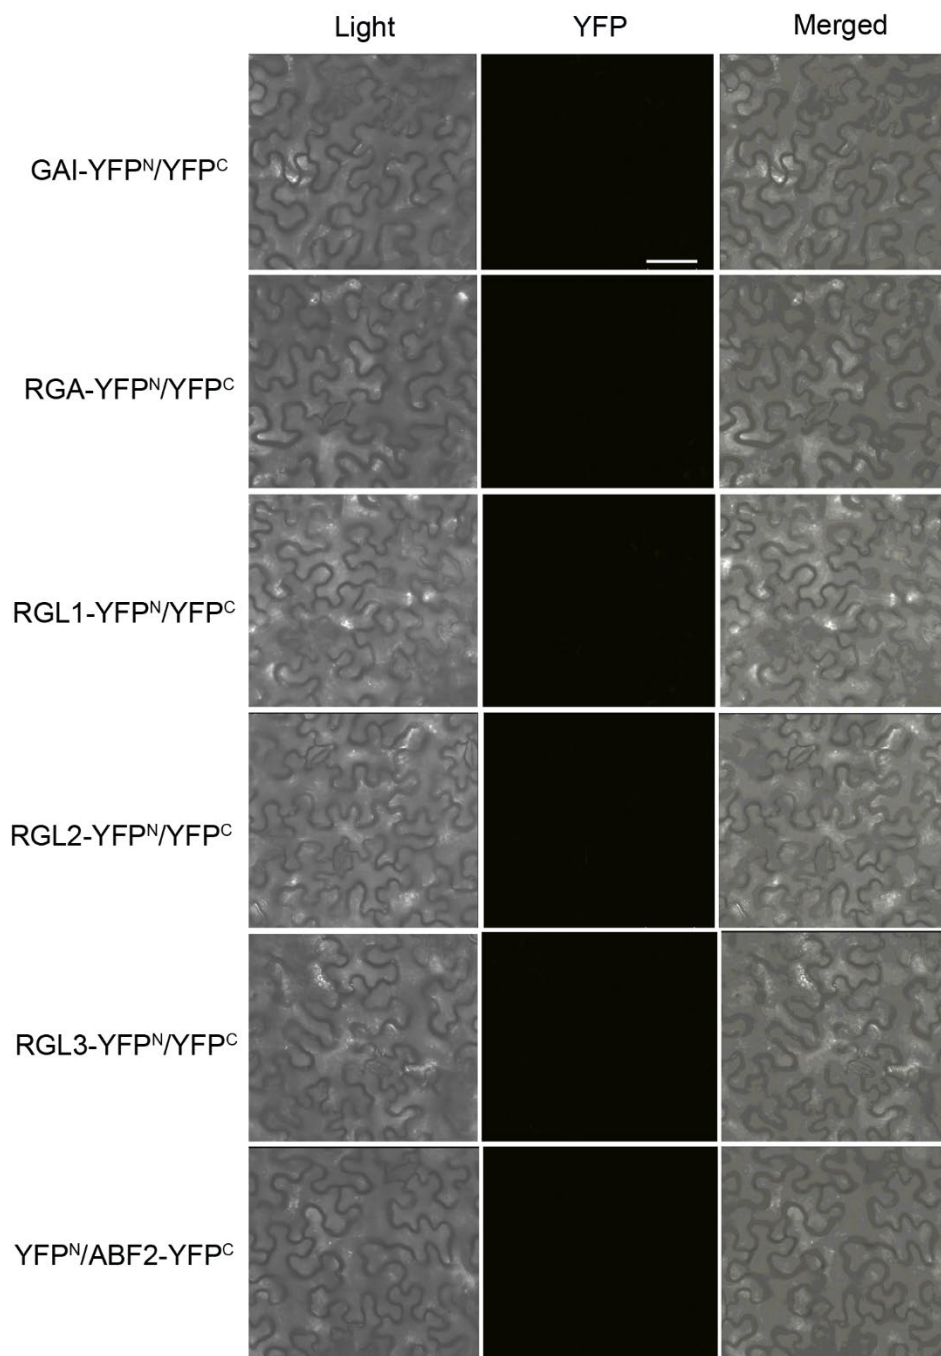

**Figure S1.** DELLA proteins interact with ABF2. Negative controls of BiFC assay between DELLA proteins and ABF2. *N. benthamiana* leaves were co-transformed with constructs containing the indicated YFP N-terminal (YFPN) and YFP C-terminal (YFPC) fusions, and YFP was imaged 48 h after transformation. Bar = 50  $\mu$ m.
